# Supplementary material
Source: HighWire-hosted journal article supplement (http://qhc.bmj.com/highwire/filestream/147535/field_highwire_adjunct_files/0/bmjqs-2011-000460supp_figure1.pdf)
Supplement: bmjqs-2011-000460supp_figure1.pdf [file bmjqs-2011-000460supp_figure1.pdf]

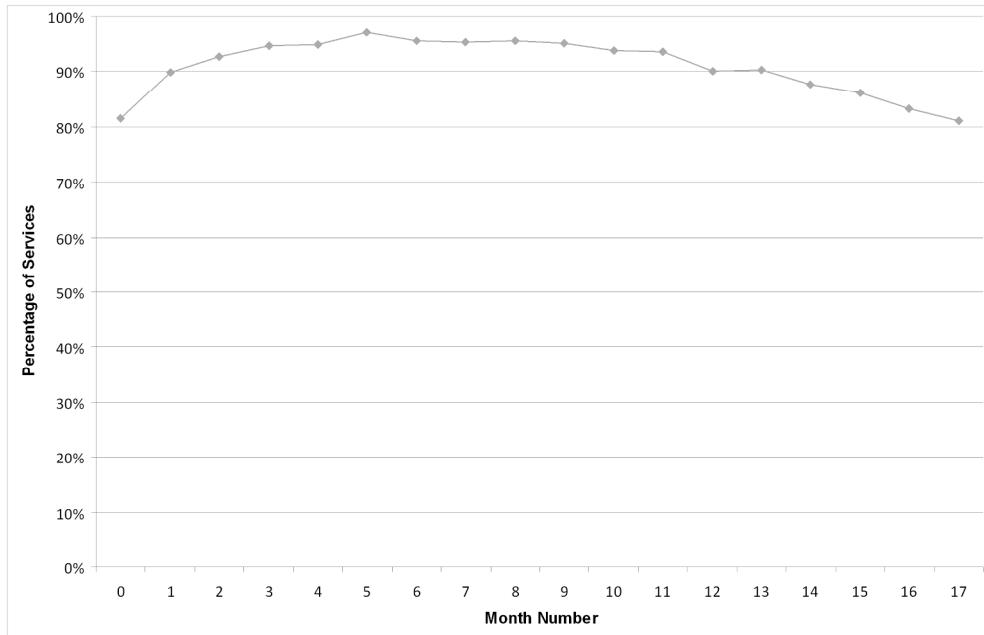

Appendix 1  
Percentage of health services submitting the HbA1C measure (n=743)  
This figure aggregates results from the seven waves occurring progressively over the project  
217x140mm (300 x 300 DPI)
